# Supplementary material for: Gene Network Analysis for Osteoporosis, Sarcopenia, Diabetes, and Obesity in Human Mesenchymal Stromal Cells
Source: MDPI journal article supplement (doi:10.3390/genes13030459), 2022-03-03
Supplement: s1 [file s1]

## Supplementary Tables

**Table S1.** RNA-sequencing data of 38 genes related to osteoblasts, osteoclasts, bone remodeling, osteoporosis, and sarcopenia in mesenchymal stromal cells among participants in the control group.

| Gene symbol   | Entrez Gene Name                           | no .1          |                        | no .2          |                       | no .3          |                       | no .4          |                        | no .5          |                        |
|---------------|--------------------------------------------|----------------|------------------------|----------------|-----------------------|----------------|-----------------------|----------------|------------------------|----------------|------------------------|
|               |                                            | Expr Log Ratio | Expr <i>p</i> -value   | Expr Log Ratio | Expr <i>p</i> -value  | Expr Log Ratio | Expr <i>p</i> -value  | Expr Log Ratio | Expr <i>p</i> -value   | Expr Log Ratio | Expr <i>p</i> -value   |
| <i>ACKR3</i>  | atypical chemokine receptor 3              | 6.86           | $9.29 \times 10^{-12}$ | 1.44           | $1.99 \times 10^{-1}$ | 1.30           | $3.50 \times 10^{-1}$ | 3.90           | $1.51 \times 10^{-6}$  | 15.06          | $1.14 \times 10^{-19}$ |
| <i>AGT</i>    | angiotensinogen                            | -2.11          | $1.12 \times 10^{-2}$  | 1.01           | $9.85 \times 10^{-1}$ | 4.00           | $2.13 \times 10^{-6}$ | -1.02          | $9.58 \times 10^{-1}$  | 3.40           | $2.00 \times 10^{-4}$  |
| <i>BCL2</i>   | BCL2 apoptosis regulator                   | -1.47          | $1.66 \times 10^{-1}$  | 1.54           | $1.16 \times 10^{-1}$ | 2.09           | $7.37 \times 10^{-3}$ | 1.19           | $5.36 \times 10^{-1}$  | -1.07          | $8.24 \times 10^{-1}$  |
| <i>BDKRB2</i> | bradykinin receptor B2                     | 27.36          | $1.08 \times 10^{-52}$ | 3.53           | $6.82 \times 10^{-9}$ | 1.68           | $1.76 \times 10^{-2}$ | 12.46          | $2.82 \times 10^{-31}$ | 17.27          | $2.08 \times 10^{-34}$ |
| <i>BMP2</i>   | bone morphogenetic protein 2               | 8.68           | $3.29 \times 10^{-13}$ | -1.20          | $5.51 \times 10^{-1}$ | 1.28           | $4.17 \times 10^{-1}$ | 2.63           | $1.26 \times 10^{-3}$  | 6.76           | $4.85 \times 10^{-10}$ |
| <i>C3AR1</i>  | complement C3a receptor 1                  | 1.32           | $4.26 \times 10^{-1}$  | 3.40           | $4.33 \times 10^{-4}$ | 1.16           | $6.70 \times 10^{-1}$ | 2.26           | $1.85 \times 10^{-2}$  | 1.05           | $9.15 \times 10^{-1}$  |
| <i>C5AR1</i>  | complement C5a receptor 1                  | -2.64          | $1.13 \times 10^{-3}$  | 1.50           | $1.64 \times 10^{-1}$ | 1.31           | $3.58 \times 10^{-1}$ | -1.33          | $3.25 \times 10^{-1}$  | -2.94          | $6.29 \times 10^{-4}$  |
| <i>CCL5</i>   | C-C motif chemokine ligand 5               | 5.64           | $1.10 \times 10^{-6}$  | 2.64           | $6.31 \times 10^{-3}$ | 1.20           | $6.08 \times 10^{-1}$ | 1.27           | $5.03 \times 10^{-1}$  | 4.47           | $4.87 \times 10^{-4}$  |
| <i>CFB</i>    | complement factor B                        | 9.54           | $9.42 \times 10^{-52}$ | 1.40           | $2.59 \times 10^{-2}$ | 1.36           | $4.20 \times 10^{-2}$ | 2.17           | $2.61 \times 10^{-7}$  | 3.97           | $1.12 \times 10^{-21}$ |
| <i>CSF1</i>   | colony stimulating factor 1                | 4.44           | $3.40 \times 10^{-17}$ | 2.41           | $6.33 \times 10^{-7}$ | 1.69           | $3.20 \times 10^{-3}$ | 2.02           | $6.8 \times 10^{-5}$   | 3.50           | $1.00 \times 10^{-11}$ |
| <i>CXCL2</i>  | C-X-C motif chemokine ligand 2             | 9.75           | $1.09 \times 10^{-10}$ | 1.28           | $4.87 \times 10^{-1}$ | 2.03           | $4.48 \times 10^{-2}$ | 2.12           | $3.37 \times 10^{-2}$  | 3.79           | $2.17 \times 10^{-3}$  |
| <i>CXCL3</i>  | C-X-C motif chemokine ligand 3             | 81.44          | $7.09 \times 10^{-51}$ | 1.57           | $1.35 \times 10^{-1}$ | 2.47           | $2.62 \times 10^{-3}$ | 10.27          | $3.02 \times 10^{-15}$ | 20.71          | $4.91 \times 10^{-17}$ |
| <i>DKK1</i>   | dickkopf WNT signaling pathway inhibitor 1 | 2.34           | $1.72 \times 10^{-3}$  | -4.20          | $1.23 \times 10^{-7}$ | -2.93          | $7.36 \times 10^{-5}$ | -1.54          | $1.09 \times 10^{-1}$  | 1.07           | $8.16 \times 10^{-1}$  |
| <i>EFNB2</i>  | ephrin B2                                  | 1.19           | $5.32 \times 10^{-1}$  | 1.94           | $1.97 \times 10^{-2}$ | 1.17           | $5.75 \times 10^{-1}$ | 2.07           | $1.04 \times 10^{-2}$  | -1.05          | $8.73 \times 10^{-1}$  |

|                 |                                                   |       |                        |       |                        |       |                       |       |                        |       |                        |
|-----------------|---------------------------------------------------|-------|------------------------|-------|------------------------|-------|-----------------------|-------|------------------------|-------|------------------------|
| <i>HGF</i>      | hepatocyte growth factor                          | 1.22  | $5.68 \times 10^{-1}$  | 2.21  | $2.40 \times 10^{-2}$  | 1.34  | $4.05 \times 10^{-1}$ | 1.82  | $8.84 \times 10^{-2}$  | 1.56  | $2.05 \times 10^{-1}$  |
| <i>HSD11B1</i>  | hydroxysteroid 11-beta dehydrogenase 1            | 30.42 | $1.71 \times 10^{-30}$ | 4.50  | $5.62 \times 10^{-7}$  | 1.15  | $6.60 \times 10^{-1}$ | 18.48 | $1.29 \times 10^{-22}$ | 29.31 | $8.69 \times 10^{-26}$ |
| <i>ID1</i>      | inhibitor of DNA binding 1, HLH protein           | 2.28  | $2.79 \times 10^{-3}$  | 1.61  | $8.32 \times 10^{-2}$  | 1.80  | $3.35 \times 10^{-2}$ | 1.49  | $1.52 \times 10^{-1}$  | 5.36  | $2.84 \times 10^{-9}$  |
| <i>IGF1</i>     | insulin like growth factor 1                      | 9.02  | $2.86 \times 10^{-10}$ | 1.15  | $6.94 \times 10^{-1}$  | 1.07  | $8.51 \times 10^{-1}$ | 1.79  | $9.45 \times 10^{-2}$  | 14.37 | $3.56 \times 10^{-12}$ |
| <i>IGF2</i>     | insulin like growth factor 2                      | 1.48  | $2.20 \times 10^{-1}$  | 3.94  | $1.50 \times 10^{-5}$  | -1.07 | $8.34 \times 10^{-1}$ | 5.63  | $4.87 \times 10^{-8}$  | 4.82  | $1.72 \times 10^{-5}$  |
| <i>IL6</i>      | interleukin 6                                     | 5.48  | $1.44 \times 10^{-6}$  | 1.27  | $4.95 \times 10^{-1}$  | 1.16  | $6.83 \times 10^{-1}$ | 1.51  | $2.47 \times 10^{-1}$  | 1.66  | $2.44 \times 10^{-1}$  |
| <i>IL1R1</i>    | interleukin 1 receptor type 1                     | 3.73  | $2.24 \times 10^{-11}$ | 2.23  | $4.44 \times 10^{-5}$  | -1.03 | $8.82 \times 10^{-1}$ | 2.57  | $1.68 \times 10^{-6}$  | 3.84  | $1.08 \times 10^{-10}$ |
| <i>MDK</i>      | midkine                                           | 1.98  | $3.45 \times 10^{-2}$  | 1.97  | $3.57 \times 10^{-2}$  | 1.07  | $8.34 \times 10^{-1}$ | 2.11  | $2.07 \times 10^{-2}$  | 3.02  | $3.02 \times 10^{-3}$  |
| <i>MEF2C</i>    | myocyte enhancer factor 2C                        | -2.28 | $1.44 \times 10^{-3}$  | -1.75 | $2.96 \times 10^{-2}$  | 1.05  | $8.47 \times 10^{-1}$ | -2.70 | $1.29 \times 10^{-4}$  | -2.13 | $4.67 \times 10^{-3}$  |
| <i>NTN1</i>     | netrin 1                                          | 8.15  | $2.19 \times 10^{-11}$ | 2.26  | $9.80 \times 10^{-3}$  | 1.06  | $8.61 \times 10^{-1}$ | 7.59  | $1.02 \times 10^{-10}$ | 9.84  | $2.20 \times 10^{-12}$ |
| <i>OASL</i>     | 2'-5'-oligoadenylate synthetase like              | 7.49  | $2.63 \times 10^{-9}$  | 3.38  | $3.28 \times 10^{-4}$  | 1.48  | $2.50 \times 10^{-1}$ | 2.56  | $5.6 \times 10^{-3}$   | 1.80  | $1.68 \times 10^{-1}$  |
| <i>PCSK1</i>    | proprotein convertase subtilisin/kexin type 1     | 58.89 | $6.25 \times 10^{-39}$ | 6.65  | $1.76 \times 10^{-9}$  | 2.04  | $2.65 \times 10^{-2}$ | 21.93 | $6.03 \times 10^{-23}$ | 77.42 | $3.62 \times 10^{-39}$ |
| <i>PPARG</i>    | peroxisome proliferator activated receptor gamma  | 1.23  | $4.90 \times 10^{-1}$  | 2.80  | $6.42 \times 10^{-4}$  | -1.01 | $9.63 \times 10^{-1}$ | 2.47  | $2.72 \times 10^{-3}$  | 2.02  | $3.67 \times 10^{-2}$  |
| <i>PPARGC1A</i> | PPARG coactivator 1 alpha                         | 19.93 | $1.06 \times 10^{-18}$ | 3.02  | $1.23 \times 10^{-3}$  | 3.13  | $8.48 \times 10^{-4}$ | 12.55 | $9.02 \times 10^{-14}$ | 32.31 | $1.25 \times 10^{-21}$ |
| <i>PPL</i>      | periplakin                                        | 10.94 | $8.19 \times 10^{-14}$ | 9.13  | $5.06 \times 10^{-12}$ | 2.68  | $2.17 \times 10^{-3}$ | 19.03 | $3.57 \times 10^{-20}$ | 19.77 | $1.18 \times 10^{-15}$ |
| <i>PTGER4</i>   | prostaglandin E receptor 4                        | -1.02 | $9.39 \times 10^{-1}$  | 2.25  | $1.11 \times 10^{-4}$  | 2.54  | $8.54 \times 10^{-6}$ | 3.79  | $1.93 \times 10^{-10}$ | 5.32  | $2.16 \times 10^{-15}$ |
| <i>PTPN22</i>   | protein tyrosine phosphatase non-receptor type 22 | 8.39  | $9.75 \times 10^{-10}$ | 3.02  | $1.49 \times 10^{-3}$  | 1.19  | $6.18 \times 10^{-1}$ | 4.24  | $3.36 \times 10^{-5}$  | 7.19  | $9.98 \times 10^{-7}$  |
| <i>RAPGEF3</i>  | Rap guanine nucleotide exchange factor 3          | 2.29  | $9.04 \times 10^{-3}$  | 2.07  | $2.19 \times 10^{-2}$  | 1.05  | $8.76 \times 10^{-1}$ | 2.22  | $1.19 \times 10^{-2}$  | 4.01  | $1.77 \times 10^{-5}$  |
| <i>SFRP1</i>    | secreted frizzled related protein 1               | 6.40  | $1.01 \times 10^{-8}$  | 6.34  | $1.16 \times 10^{-8}$  | 2.66  | $2.57 \times 10^{-3}$ | 6.85  | $2.85 \times 10^{-9}$  | 6.66  | $1.30 \times 10^{-5}$  |

|                  |                                                    |       |                        |       |                        |       |                        |       |                       |       |                        |
|------------------|----------------------------------------------------|-------|------------------------|-------|------------------------|-------|------------------------|-------|-----------------------|-------|------------------------|
| <i>SOD2</i>      | superoxide dismutase 2                             | 12.35 | $4.37 \times 10^{-71}$ | 1.22  | $1.63 \times 10^{-1}$  | 1.23  | $1.47 \times 10^{-1}$  | 2.14  | $7.49 \times 10^{-8}$ | 3.92  | $9.87 \times 10^{-23}$ |
| <i>STAT1</i>     | signal transducer and activator of transcription 1 | 1.14  | $5.12 \times 10^{-1}$  | -1.87 | $1.95 \times 10^{-3}$  | -1.12 | $5.70 \times 10^{-1}$  | -2.13 | $1.66 \times 10^{-4}$ | -1.72 | $1.13 \times 10^{-2}$  |
| <i>STC1</i>      | stanniocalcin 1                                    | 12.30 | $9.38 \times 10^{-13}$ | 1.99  | $5.08 \times 10^{-2}$  | 1.49  | $2.57 \times 10^{-1}$  | 2.41  | $1.23 \times 10^{-2}$ | 5.00  | $5.46 \times 10^{-6}$  |
| <i>TF</i>        | transferrin                                        | 9.48  | $1.06 \times 10^{-11}$ | 8.84  | $4.41 \times 10^{-11}$ | 2.21  | $1.68 \times 10^{-2}$  | 4.16  | $1.74 \times 10^{-5}$ | 5.08  | $6.04 \times 10^{-5}$  |
| <i>TNFRSF11B</i> | TNF receptor superfamily member 11b                | 2.63  | $4.68 \times 10^{-9}$  | -2.20 | $1.88 \times 10^{-6}$  | -4.73 | $1.02 \times 10^{-20}$ | -1.36 | $6.29 \times 10^{-2}$ | -1.56 | $9.13 \times 10^{-3}$  |

---

Entrez gene name, expression levels, and *p*-values of genes are listed for each sample. All data leave 2 digits after the decimal point.

**Table S2.** Genes commonly upregulated or downregulated in control subject no. 3 according to RNA-sequencing data, compared to control participants no. 1 (A), 2 (B), 4 (C), and 5 (D).

A

| Common up (27)  | Common down (0) | no.3 down & no.1 up (6) | no.3 up & no.1 down (5) |
|-----------------|-----------------|-------------------------|-------------------------|
| <i>ACKR3</i>    | —               | <i>DKK1</i>             | <i>AGT</i>              |
| <i>BDKRB2</i>   |                 | <i>IGF2</i>             | <i>BCL2</i>             |
| <i>BMP2</i>     |                 | <i>IL1R1</i>            | <i>C5AR1</i>            |
| <i>C3AR1</i>    |                 | <i>PPARG</i>            | <i>MEF2C</i>            |
| <i>CCL5</i>     |                 | <i>STAT1</i>            | <i>PTGER4</i>           |
| <i>CFB</i>      |                 | <i>TNFRSF11B</i>        |                         |
| <i>CSF1</i>     |                 |                         |                         |
| <i>CXCL2</i>    |                 |                         |                         |
| <i>CXCL3</i>    |                 |                         |                         |
| <i>EFNB2</i>    |                 |                         |                         |
| <i>HGF</i>      |                 |                         |                         |
| <i>HSD11B1</i>  |                 |                         |                         |
| <i>ID1</i>      |                 |                         |                         |
| <i>IGF1</i>     |                 |                         |                         |
| <i>IL6</i>      |                 |                         |                         |
| <i>MDK</i>      |                 |                         |                         |
| <i>NTN1</i>     |                 |                         |                         |
| <i>OASL</i>     |                 |                         |                         |
| <i>PCSK1</i>    |                 |                         |                         |
| <i>PPARGC1A</i> |                 |                         |                         |
| <i>PPL</i>      |                 |                         |                         |
| <i>PTPN22</i>   |                 |                         |                         |
| <i>RAPGEF3</i>  |                 |                         |                         |

B

| Common up (30)  | Common down (3)  | no.3 down & no.2 up (3) | no.3 up & no.2 down (2) |
|-----------------|------------------|-------------------------|-------------------------|
| <i>ACKR3</i>    | <i>DKK1</i>      | <i>IGF2</i>             | <i>BMP2</i>             |
| <i>AGT</i>      | <i>STAT1</i>     | <i>IL1R1</i>            | <i>MEF2C</i>            |
| <i>BCL2</i>     | <i>TNFRSF11B</i> | <i>PPARG</i>            |                         |
| <i>BDKRB2</i>   |                  |                         |                         |
| <i>C3AR1</i>    |                  |                         |                         |
| <i>C5AR1</i>    |                  |                         |                         |
| <i>CCL5</i>     |                  |                         |                         |
| <i>CFB</i>      |                  |                         |                         |
| <i>CSF1</i>     |                  |                         |                         |
| <i>CXCL2</i>    |                  |                         |                         |
| <i>CXCL3</i>    |                  |                         |                         |
| <i>EFNB2</i>    |                  |                         |                         |
| <i>HGF</i>      |                  |                         |                         |
| <i>HSD11B1</i>  |                  |                         |                         |
| <i>ID1</i>      |                  |                         |                         |
| <i>IGF1</i>     |                  |                         |                         |
| <i>IL6</i>      |                  |                         |                         |
| <i>MDK</i>      |                  |                         |                         |
| <i>NTN1</i>     |                  |                         |                         |
| <i>OASL</i>     |                  |                         |                         |
| <i>PCSK1</i>    |                  |                         |                         |
| <i>PPARGC1A</i> |                  |                         |                         |
| <i>PPL</i>      |                  |                         |                         |

*SFRP1*  
*SOD2*  
*STC1*  
*TF*

---

*PTGER4*  
*PTPN22*  
*RAPGEF3*  
*SFRP1*  
*SOD2*  
*STC1*  
*TF*

---

C

| Common up (29) | Common down (3)  | no.3 down & no.4 up (3) | no.3 up & no.4 down (3) |
|----------------|------------------|-------------------------|-------------------------|
| <i>ACKR3</i>   | <i>DKK1</i>      | <i>IGF2</i>             | <i>AGT</i>              |
| <i>BCL2</i>    | <i>STAT1</i>     | <i>IL1R1</i>            | <i>C5AR1</i>            |
| <i>BDKRB2</i>  | <i>TNFRSF11B</i> | <i>PPARG</i>            | <i>MEF2C</i>            |
| <i>BMP2</i>    |                  |                         |                         |
| <i>C3AR1</i>   |                  |                         |                         |
| <i>CCL5</i>    |                  |                         |                         |
| <i>CFB</i>     |                  |                         |                         |
| <i>CSF1</i>    |                  |                         |                         |
| <i>CXCL2</i>   |                  |                         |                         |
| <i>CXCL3</i>   |                  |                         |                         |
| <i>EFNB2</i>   |                  |                         |                         |
| <i>HGF</i>     |                  |                         |                         |
| <i>HSD11B1</i> |                  |                         |                         |
| <i>ID1</i>     |                  |                         |                         |
| <i>IGF1</i>    |                  |                         |                         |
| <i>IL6</i>     |                  |                         |                         |
| <i>MDK</i>     |                  |                         |                         |

D

| Common up (28) | Common down (2)  | no.3 down & no.5 up (4) | no.3 up & no.5 down (4) |
|----------------|------------------|-------------------------|-------------------------|
| <i>ACKR3</i>   | <i>STAT1</i>     | <i>DKK1</i>             | <i>BCL2</i>             |
| <i>AGT</i>     | <i>TNFRSF11B</i> | <i>IGF2</i>             | <i>C5AR1</i>            |
| <i>BDKRB2</i>  |                  | <i>IL1R1</i>            | <i>EFNB2</i>            |
| <i>BMP2</i>    |                  | <i>PPARG</i>            | <i>MEF2C</i>            |
| <i>C3AR1</i>   |                  |                         |                         |
| <i>CCL5</i>    |                  |                         |                         |
| <i>CFB</i>     |                  |                         |                         |
| <i>CSF1</i>    |                  |                         |                         |
| <i>CXCL2</i>   |                  |                         |                         |
| <i>CXCL3</i>   |                  |                         |                         |
| <i>HGF</i>     |                  |                         |                         |
| <i>HSD11B1</i> |                  |                         |                         |
| <i>ID1</i>     |                  |                         |                         |
| <i>IGF1</i>    |                  |                         |                         |
| <i>IL6</i>     |                  |                         |                         |
| <i>MDK</i>     |                  |                         |                         |
| <i>NTN1</i>    |                  |                         |                         |

*NTN1*  
*OASL*  
*PCSK1*  
*PPARGC1A*  
*PPL*  
*PTGER4*  
*PTPN22*  
*RAPGEF3*  
*SFRP1*  
*SOD2*  
*STC1*  
*TF*

---

*OASL*  
*PCSK1*  
*PPARGC1A*  
*PPL*  
*PTGER4*  
*PTPN22*  
*RAPGEF3*  
*SFRP1*  
*SOD2*  
*STC1*  
*TF*

---

**Table S3.** Expression of 24 genes related to obesity and diabetes in mesenchymal stromal cells among participants in the control group based on RNA-sequencing data.

| Gene Symbol     | Entrez Gene Name                                           | no .1     |                          | no .2     |                          | no .3     |                         | no .4     |                          | no .5     |                          |
|-----------------|------------------------------------------------------------|-----------|--------------------------|-----------|--------------------------|-----------|-------------------------|-----------|--------------------------|-----------|--------------------------|
|                 |                                                            | Expr      | Expr                     | Expr      | Expr                     | Expr      | Expr                    | Expr      | Expr                     | Expr      | Expr                     |
|                 |                                                            | Log Ratio | p-value                  | Log Ratio | p-value                  | Log Ratio | p-value                 | Log Ratio | p-value                  | Log Ratio | p-value                  |
| <i>CIQTNF1</i>  | C1q and TNF related 1                                      | 16.53     | 2.45 x 10 <sup>-63</sup> | 3.11      | 1.55 x 10 <sup>-11</sup> | 1.90      | 1.50 x 10 <sup>-4</sup> | 3.95      | 3.33 x 10 <sup>-16</sup> | 7.92      | 8.22 x 10 <sup>-35</sup> |
| <i>CFB</i>      | complement factor B                                        | 9.54      | 9.42 x 10 <sup>-52</sup> | 1.40      | 2.59 x 10 <sup>-2</sup>  | 1.36      | 4.20 x 10 <sup>-2</sup> | 2.17      | 2.61 x 10 <sup>-7</sup>  | 3.97      | 1.12 x 10 <sup>-21</sup> |
| <i>CHI3L1</i>   | chitinase 3 like 1                                         | 15.65     | 3.20 x 10 <sup>-15</sup> | 2.16      | 2.77 x 10 <sup>-2</sup>  | 1.85      | 7.79 x 10 <sup>-2</sup> | 2.94      | 2.00 x 10 <sup>-3</sup>  | 16.26     | 1.59 x 10 <sup>-10</sup> |
| <i>CP</i>       | ceruloplasmin                                              | 14.03     | 1.96 x 10 <sup>-14</sup> | 15.24     | 2.90 x 10 <sup>-15</sup> | 2.17      | 2.53 x 10 <sup>-2</sup> | 10.59     | 8.23 x 10 <sup>-12</sup> | 40.73     | 6.12 x 10 <sup>-22</sup> |
| <i>CSF1</i>     | colony stimulating factor 1                                | 4.44      | 3.40 x 10 <sup>-17</sup> | 2.41      | 6.33 x 10 <sup>-7</sup>  | 1.69      | 3.20 x 10 <sup>-3</sup> | 2.02      | 6.80 x 10 <sup>-5</sup>  | 3.50      | 1.00 x 10 <sup>-11</sup> |
| <i>CXCL2</i>    | C-X-C motif chemokine ligand 2                             | 9.75      | 1.09 x 10 <sup>-10</sup> | 1.28      | 4.87 x 10 <sup>-1</sup>  | 2.03      | 4.48 x 10 <sup>-2</sup> | 2.12      | 3.37 x 10 <sup>-2</sup>  | 3.79      | 2.17 x 10 <sup>-3</sup>  |
| <i>GNA14</i>    | G protein subunit alpha 14                                 | 8.77      | 4.62 x 10 <sup>-11</sup> | 4.35      | 8.63 x 10 <sup>-6</sup>  | 1.34      | 3.86 x 10 <sup>-1</sup> | 7.26      | 1.92 x 10 <sup>-9</sup>  | 47.70     | 2.29 x 10 <sup>-43</sup> |
| <i>HSD11B1</i>  | hydroxysteroid 11-beta dehydrogenase 1                     | 30.42     | 1.71 x 10 <sup>-30</sup> | 4.50      | 5.62 x 10 <sup>-7</sup>  | 1.15      | 6.60 x 10 <sup>-1</sup> | 18.48     | 1.29 x 10 <sup>-22</sup> | 29.31     | 8.69 x 10 <sup>-26</sup> |
| <i>IGF1</i>     | insulin like growth factor 1                               | 9.02      | 2.86 x 10 <sup>-10</sup> | 1.15      | 6.94 x 10 <sup>-1</sup>  | 1.07      | 8.51 x 10 <sup>-1</sup> | 1.79      | 9.45 x 10 <sup>-2</sup>  | 14.37     | 3.56 x 10 <sup>-12</sup> |
| <i>IL6</i>      | interleukin 6                                              | 5.48      | 1.44 x 10 <sup>-6</sup>  | 1.27      | 4.95 x 10 <sup>-1</sup>  | 1.16      | 6.83 x 10 <sup>-1</sup> | 1.51      | 2.47 x 10 <sup>-1</sup>  | 1.66      | 2.44 x 10 <sup>-1</sup>  |
| <i>KCNJ2</i>    | potassium inwardly rectifying channel subfamily J member 2 | 13.25     | 1.87 x 10 <sup>-16</sup> | 8.06      | 3.16 x 10 <sup>-11</sup> | 1.16      | 6.56 x 10 <sup>-1</sup> | 6.69      | 1.66 x 10 <sup>-9</sup>  | 4.85      | 5.07 x 10 <sup>-5</sup>  |
| <i>KYNU</i>     | kynureninase                                               | 21.47     | 1.94 x 10 <sup>-20</sup> | 5.51      | 2.70 x 10 <sup>-7</sup>  | 3.76      | 6.62 x 10 <sup>-5</sup> | 17.83     | 3.25 x 10 <sup>-18</sup> | 35.81     | 1.14 x 10 <sup>-21</sup> |
| <i>LBP</i>      | lipopolysaccharide binding protein                         | 47.99     | 2.49 x 10 <sup>-41</sup> | 98.05     | 1.03 x 10 <sup>-57</sup> | 3.72      | 1.34 x 10 <sup>-5</sup> | 66.30     | 2.21 x 10 <sup>-48</sup> | 84.07     | 2.62 x 10 <sup>-39</sup> |
| <i>MME</i>      | membrane metalloendopeptidase                              | 15.40     | 3.13 x 10 <sup>-48</sup> | 3.21      | 6.31 x 10 <sup>-10</sup> | 1.07      | 7.19 x 10 <sup>-1</sup> | 6.60      | 9.86 x 10 <sup>-24</sup> | 3.18      | 4.14 x 10 <sup>-8</sup>  |
| <i>NR4A2</i>    | nuclear receptor subfamily 4 group A member 2              | 16.51     | 1.72 x 10 <sup>-40</sup> | 4.20      | 1.42 x 10 <sup>-11</sup> | 1.35      | 1.68 x 10 <sup>-1</sup> | 6.80      | 1.52 x 10 <sup>-19</sup> | 7.02      | 5.13 x 10 <sup>-18</sup> |
| <i>NTN1</i>     | netrin 1                                                   | 8.15      | 2.19 x 10 <sup>-11</sup> | 2.26      | 9.80 x 10 <sup>-3</sup>  | 1.06      | 8.61 x 10 <sup>-1</sup> | 7.59      | 1.02 x 10 <sup>-10</sup> | 9.84      | 2.20 x 10 <sup>-12</sup> |
| <i>OAS1</i>     | 2'-5'-oligoadenylate synthetase 1                          | 8.05      | 1.79 x 10 <sup>-9</sup>  | 3.94      | 7.73 x 10 <sup>-5</sup>  | 2.70      | 4.21 x 10 <sup>-3</sup> | 3.43      | 3.82 x 10 <sup>-4</sup>  | 7.11      | 1.57 x 10 <sup>-6</sup>  |
| <i>PCSK1</i>    | proprotein convertase subtilisin/kexin type 1              | 58.89     | 6.25 x 10 <sup>-39</sup> | 6.65      | 1.76 x 10 <sup>-9</sup>  | 2.04      | 2.65 x 10 <sup>-2</sup> | 21.93     | 6.03 x 10 <sup>-23</sup> | 77.42     | 3.62 x 10 <sup>-39</sup> |
| <i>PDK4</i>     | pyruvate dehydrogenase kinase 4                            | 10.25     | 8.95 x 10 <sup>-13</sup> | 1.57      | 1.69 x 10 <sup>-1</sup>  | 2.15      | 1.91 x 10 <sup>-2</sup> | 1.92      | 4.71 x 10 <sup>-2</sup>  | 10.59     | 2.36 x 10 <sup>-11</sup> |
| <i>PLIN2</i>    | perilipin 2                                                | 6.44      | 3.04 x 10 <sup>-36</sup> | 1.52      | 4.82 x 10 <sup>-3</sup>  | 1.07      | 6.74 x 10 <sup>-1</sup> | 1.00      | 9.85 x 10 <sup>-1</sup>  | 1.37      | 3.76 x 10 <sup>-2</sup>  |
| <i>PPARGCIA</i> | PPARG coactivator 1 alpha                                  | 19.93     | 1.06 x 10 <sup>-18</sup> | 3.02      | 1.23 x 10 <sup>-3</sup>  | 3.13      | 8.48 x 10 <sup>-4</sup> | 12.55     | 9.02 x 10 <sup>-14</sup> | 32.31     | 1.25 x 10 <sup>-21</sup> |

|              |                           |       |                        |      |                        |      |                        |       |                        |      |                        |
|--------------|---------------------------|-------|------------------------|------|------------------------|------|------------------------|-------|------------------------|------|------------------------|
| <i>PTGDS</i> | prostaglandin D2 synthase | 9.26  | $1.78 \times 10^{-25}$ | 5.15 | $1.61 \times 10^{-14}$ | 4.07 | $5.27 \times 10^{-11}$ | 13.65 | $1.48 \times 10^{-34}$ | 3.19 | $1.91 \times 10^{-6}$  |
| <i>SOD2</i>  | superoxide dismutase 2    | 12.35 | $4.37 \times 10^{-71}$ | 1.22 | $1.63 \times 10^{-1}$  | 1.23 | $1.47 \times 10^{-1}$  | 2.14  | $7.49 \times 10^{-8}$  | 3.92 | $9.87 \times 10^{-23}$ |
| <i>TF</i>    | transferrin               | 9.48  | $1.06 \times 10^{-11}$ | 8.84 | $4.41 \times 10^{-11}$ | 2.21 | $1.68 \times 10^{-2}$  | 4.16  | $1.74 \times 10^{-5}$  | 5.08 | $6.04 \times 10^{-5}$  |

---

Entrez gene name, expression levels, and *p*-values of genes are listed for each sample. All data leave 2 digits after the decimal point.
